# Supplementary material for: Amotl2a interacts with the Hippo effector Yap1 and the Wnt/β-catenin effector Lef1 to control tissue size in zebrafish
Source: eLife. 2015 Sep 3;4:e08201. doi: 10.7554/eLife.08201 (PMC4596637; doi:10.7554/eLife.08201)
Supplement: Figure 1—source data 1. — DOI: http://dx.doi.org/10.7554/eLife.08201.004 [file elife08201s001.xlsx]

## Sheet: J
	Relative length of the amotl2a-free domain
	Siblings	hs_fgf3
	0.175282	0.0870158
	0.180379	0.0546136
	0.267479	0.0630389
	0.11688	0.0663537
	0.192672	0.121056
	0.227537	0.0616824
	0.256958	0.0563091
	0.122953	0.0822564
	0.229884	0.092787
	0.195707	0.0800573
	0.181686	0.10842
	0.0495927	0.162471
	0.164615	0.0695489
	0.127815	0.05969
	0.182558	0.0542951
	0.16865	0.068675
	0.217765	0.0560076
	0.0611519	0.0931701
	0.167905	0.140232
	0.175303	0.0472724
	0.139434	0.0550958
	0.143053	0.0369416
	0.132981	0.0976836
	0.0879854	0.0323928
	0.0707812	0.0506856
	0.1124	0.109774
	0.237114	0.0374938
	0.10622	0.068405
	0.137409	0.0354421
	0.0615364	0.0996312
	0.0819242	0.0531732
	0.0520188
	0.181729
	0.183633
	0.115563
average	0.151616	0.0742474
n	35	31
	hs:fgf3 vs siblings
difference	-0.510293
P value	< 0.0001

## Sheet: K
	Relative length of the amotl2a-expressing domain
	Siblings	hs_fgf3
	0.164642	0.798599
	0.21608	0.489954
	0.301444	0.471189
	0.365241	0.471596
	0.237591	0.343112
	0.315559	0.665172
	0.197646	0.716861
	0.310894	0.570471
	0.154299	0.359737
	0.271649	0.556004
	0.184896	0.465267
	0.287687	0.313387
	0.207405	0.4473
	0.277233	0.578148
	0.301103	0.71409
	0.221063	0.371647
	0.396039	0.432894
	0.451919	0.77315
	0.326687	0.497067
	0.558606	0.50065
	0.361692	0.442365
	0.355192	0.784485
	0.412462	0.31273
	0.39028	0.467309
	0.369019	0.569925
	0.310451	0.884691
	0.33468	0.528534
	0.408204	0.780417
	0.403849	0.827406
	0.3652	0.703916
	0.347036	0.535031
	0.302588
	0.266309
	0.40942
	0.442345
average	0.320755	0.560423
n	35	31
	hs:fgf3 vs siblings
difference	0.747201
P value	< 0.0001
