# Supplementary material for: Amotl2a interacts with the Hippo effector Yap1 and the Wnt/β-catenin effector Lef1 to control tissue size in zebrafish
Source: eLife. 2015 Sep 3;4:e08201. doi: 10.7554/eLife.08201 (PMC4596637; doi:10.7554/eLife.08201)
Supplement: Figure 2—source data 1. — DOI: http://dx.doi.org/10.7554/eLife.08201.007 [file elife08201s002.xlsx]

## Sheet: migration speed
	Migration speed um/h
	Control	Morphants
	73.1258	48.3016
	76.2218	20.134
	62.4539	52.9847
	69.1853	31.4473
	58.8837	28.6275
	57.2432	48.8111
	58.6559	66.0386
	65.9068	48.027
	51.1761	33.4999
	56.204	36.8978
	57.5681	53.6255
	52.6501	46.7996
	58.0649	38.236
	57.3433	40.5559
	65.6508	21.2506
	62.6396	29.749
	67.7366	43.2399
	58.4433	44.328
	66.6064	38.6674
	68.4265	33.7297
	62.2252	35.6452
	56.3832	34.0834
	61.7834	28.9315
	61.8893	36.0659
	62.5915	42.3348
	60.5745	39.5177
	54.9895	38.3908
	61.2764	43.3929
	63.4127	37.2436
	59.5555	44.3215
	59.3107	34.7808
	49.1567	39.1493
	53.4242	32.9403
	62.456	40.0453
	59.8912	47.1255
	67.2503	36.0787
	65.5083	35.7572
	56.0077	50.4531
	68.6413	27.3904
		32.8082
		34.4556
		49.6893
		36.2243
		53.1919
		47.4668
		31.5435
		42.7739
		33.1409
		47.0731
		58.7912
		36.4204
		34.2081
		48.033
		36.3759
		47.639
		41.2446
average	61.2952	39.9943
n	39	56
	amotl2a morphants vs controls
Difference	-0.347514
P value	< 0.0001
