# Supplementary material for: Amotl2a interacts with the Hippo effector Yap1 and the Wnt/β-catenin effector Lef1 to control tissue size in zebrafish
Source: eLife. 2015 Sep 3;4:e08201. doi: 10.7554/eLife.08201 (PMC4596637; doi:10.7554/eLife.08201)
Supplement: Figure 3—source data 1. — DOI: http://dx.doi.org/10.7554/eLife.08201.011 [file elife08201s003.xlsx]

## Sheet: Amotl2aMo 30hpf
CELL COUNTS	Cell counts in amotl2a morphants
	Experiment n°1			Experiment n°2			Experiment n°3			Experiment n°4			Experiment n°5			Experiment n°6			Experiment n°7			Experiment n°8			Experiment n°9			Experiment n°10			Experiment n°11			Experiment n°12			Total 12 experiments
	controls	p53Mo	Amotl2aMo	controls	p53Mo	Amotl2aMo	controls	p53Mo	Amotl2aMo	controls	p53Mo	Amotl2aMo	controls	p53Mo	Amotl2aMo	controls	p53Mo	Amotl2aMo	controls	p53Mo	Amotl2aMo	controls	p53Mo	Amotl2aMo	controls	p53Mo	Amotl2aMo	controls	p53Mo	Amotl2aMo	controls	p53Mo	Amotl2aMo	controls	p53Mo	Amotl2aMo	controls	p53Mo	Amotl2aMo
	153	125	212	113	122	171	132	116	215	112	135	183	128	145	104	165	141	200	138	125	176	131	130	211	137	138	158	114	141	173	141	113	139	122	110	133
	118	135	216	103	129	196	101	161	169	135	129	163	155	135	203	130	140	197	130	129	144	132	112	198	106	154	176	118	128	178	113	94	153	122	128	169
	155	124	189	112	98	180	135	115	276	132	95	159	116	148	123	120	126	215	146	127	202	111	117	174	139	144	173	104	122	171	75	71	120	137	109	213
	149	134	195	99	131	155	137	137	167	108	109	135	129	134	149	184	138	228	124	170	166	82	113	152	163	131	163	114	151	202	135	67	176	158	125	173
	119	140	179	137	99	151	144	127	236	119	127	195	123	147	191	137	129	164	132	171	193	176	114	177	149	173	177	100	140	155	103		176	139	140	168
	140	130	210	113	134	169	124	150	173	137	114	196	125	134	157	124	147	146	134	167	173	108	117	241	140	162	134	97	112	170	139		157	123	129	230
	128	201	172	113	131	171	143	184	176	142	123	190	126	111		176	124	195	110	151	134		153	164	130	148	205	91	120	203	105		149	127	149	176
	127	132	186	90	136	150	121	188	199	177	147	177				129	150	229	146	160	181		117	230	135	134	191	124	110	180	142		199	157	148	203
	174	120	205	113	125	164	109	181	170	128	83	151				152	114	152	140	198					140	169	151	109	119	196	93		125	133	111	165
	129	128	206	88	133	172		159	217	147	113	154				94	118		112	172					133	147	223	88	148	182	120		165	126	141	166
	146	119	202	118	124	133				160	111	143							121	158					179	180	156	107	127	158	106		128	123	119	149
	105	137	165	97	129	173				121	136	132													154	134	193	110	143	151	131		149	155	117	201
	131	152	174		138	157				129	134														155	121	173	121	138		119		154	115	119	149
	153	120	200			128																					162	104	124		137		155		117	193
	116					161																					179		119				145
						141
						116
						150
						121
						176
						143
						121
						159
						154
						135
						141
						153
						182
						176
						139
						182
						162
						180
						154
						176
						121
						135
						216
						225
						201
						157
						149
average	136.2	135.5	193.643	108	125.308	159.429	127.333	151.8	199.8	134.385	119.692	164.833	128.857	136.286	154.5	141.1	132.7	191.778	130.273	157.091	171.125	123.333	121.625	193.375	143.077	148.846	174.267	107.214	129.467	176.583	118.5	86.25	152.667	133.615	125.857	177.714	139.007	142.16	191.946
n	15	14	14	12	13	42	9	10	10	13	13	12	7	7	6	10	10	9	11	11	8	6	8	8	13	13	15	14	15	12	14	4	15	13	14	14	152	146	179
	Amotl2aMo vs ctrl	Amotl2aMo vs p53Mo	p53Mo vs ctrl
Difference	0.380836	0.350212	0.022681
P values	1.58e-40	9.53e-31	0.02
