# Supplementary material for: Amotl2a interacts with the Hippo effector Yap1 and the Wnt/β-catenin effector Lef1 to control tissue size in zebrafish
Source: eLife. 2015 Sep 3;4:e08201. doi: 10.7554/eLife.08201 (PMC4596637; doi:10.7554/eLife.08201)
Supplement: Figure 3—source data 2. — DOI: http://dx.doi.org/10.7554/eLife.08201.012 [file elife08201s004.xlsx]

## Sheet: Sheet1
Cell count	Amotl2aMo rescue
	Experiment n°1					Experiment n°2					Experiment n°3
	Uninjected controls	p53Mo controls	Amotl2aMo	Amotl2aMo+ amotl2am RNA	amotl2am RNA	Uninjected controls	p53Mo controls	Amotl2aMo	Amotl2aMo+ amotl2am RNA	amotl2am RNA	Uninjected controls	p53Mo controls	Amotl2aMo	Amotl2aMo+ amotl2am RNA	amotl2am RNA
	122	110	133	126	120	113	122	171	128	107	138	125	176	176	95
	122	128	169	161	136	103	129	196	161	131	130	129	144	140	102
	137	109	213	99	145	112	98	180	141	109	146	127	202	131	130
	158	125	173	143	125	99	131	155	116	137	124	170	166	157	116
	139	140	168	149	91	137	99	151	150	177	132	171	193	139	123
	123	129	230	154	123	113	134	169	121	141	134	167	173	140	113
	127	149	176	142	104	113	131	171	176	124	110	151	134	119	122
	157	148	203	146	96	90	136	150	143	104	146	160	181	156	116
	133	111	165	155	139	113	125	164	121	113	140	198		156	121
	126	141	166	145	89	88	133	172	159	99	112	172		167	121
	123	119	149	148	108	118	124	133	154	156	121	158			106
	155	117	201	147	87	97	129	173	135	125					114
	115	119	149	156	90		138	157	141	97					126
		117	193	103	121				153	102
					106
					97
					123
					118
					127
					91
					132
					103
					100
					137
					113
					124
					85
					103
					147
																	Totals
																	Uninjected controls	p53Mo controls	Amotl2aMo	Amotl2aMo+ amotl2am RNA	amotl2am RNA
Average	133.615	125.857	177.714	141	113.103	108	125.308	164.769	142.786	123	130.273	157.091	171.125	148.1	115.769		371.888	408.256	513.609	431.886	351.873
n	13	14	14	14	29	12	13	13	14	14	11	11	8	10	13		36	38	35	38	56
	p53Mo controls vs. Uninjected controls	Amotl2aMo vs. Uninjected controls	Amotl2aMo+ amotl2am RNA vs. Uninjected controls	amotl2am RNA vs. Uninjected controls	Amotl2aMo vs. p53Mo controls	Amotl2aMo+ amotl2am RNA vs. p53Mo controls	amotl2am RNA vs. p53Mo controls	Amotl2aMo+ amotl2am RNA vs. Amotl2aMo
Difference	0.097	0.38	0.1613	-0.0005	0.258	0.057	-0.138	-0.159115
P value	0.0073016	2.0063e-14	5.3953e-06	0.027623	1.6479e-09	0.05082	5.1689e-05	4.7145e-06
