# Supplementary material for: Amotl2a interacts with the Hippo effector Yap1 and the Wnt/β-catenin effector Lef1 to control tissue size in zebrafish
Source: eLife. 2015 Sep 3;4:e08201. doi: 10.7554/eLife.08201 (PMC4596637; doi:10.7554/eLife.08201)
Supplement: Figure 3—source data 3. — DOI: http://dx.doi.org/10.7554/eLife.08201.013 [file elife08201s005.xlsx]

## Sheet: J
	EdU ratio entire pLLP
	Control	p53MO	Amotl2aMO
	0.544593	0.440476	0.816667
	0.474831	0.421799	0.92432
	0.615479	0.594406	0.739107
	0.3625	0.469231	0.779954
	0.592072	0.437879	0.58042
	0.48303	0.596774	0.861742
	0.574713	0.499326	0.811162
	0.505806	0.212398	0.44102
	0.52667	0.444976	0.554209
	0.413257	0.521298	0.79137
	0.634314	0.392532	0.533082
	0.457495	0.480769	0.711759
	0.411111	0.398809	0.549851
	0.461761	0.448718	0.908835
	0.546992	0.670057	0.650281
	0.525658	0.750361	0.458427
	0.334318	0.407162	0.654762
	0.393753	0.658457	0.573549
	0.475309	0.330115	0.773214
	0.493761	0.419444	0.796581
	0.58376	0.834286	0.638047
	0.567857	0.563425	0.570175
	0.49	0.321212	0.437368
	0.430018	0.391363	0.478448
	0.531046	0.593074	0.525132
	0.405714	0.605932	0.346311
	0.44748	0.532876	0.576786
	0.479303	0.320034	0.507133
	0.333724	0.665	0.557895
	0.350329	0.67033	0.566667
	0.499341	0.454248	0.500836
	0.349382	0.808036	0.602211
	0.405983	0.658515	0.607545
	0.70773	0.647872	0.369298
	0.539765	0.8663	0.51671
	0.336806	0.770048	0.436111
	0.531373	0.569964	0.602657
	0.543432	0.937276	0.869064
	0.787841	0.23913	0.358696
	0.749351	1.13691	0.693168
	0.466667	0.991304	0.617901
	0.852657	0.773042	0.745058
	0.253071	0.750774	0.562201
	0.933333	0.587719	0.5875
	0.458333	0.495082	0.526343
	0.657268	0.39527	1.08313
	0.822857	0.376923	0.722727
	0.371117	0.704348	0.691188
	0.36733	0.490545	0.816667
	0.429253	0.329861	0.485323
	0.275615	0.333333	0.77926
	0.410185	0.428459	0.833116
	0.326667		0.564444
	0.399209		0.737468
average	0.498541	0.554567	0.637461
n	54	52	54
	p53MO vs. Control	Amotl2aMO vs. Control	Amotl2aMO vs. P53MO
Difference	0.112379	0.278653	0.149476
P values	0.0978	< 0.0001	0.0187

## Sheet: K leading region
	EdU ratio leading region
	Control	p53MO	Amotl2aMo
	0.269231	0.208333	0.35
	0.219512	0.212121	0.291667
	0.318182	0.230769	0.518518
	0.05	0.2	0.387097
	0.23913	0.121212	0.307692
	0.30303	0.354839	0.424242
	0.37931	0.200000*	0.6428571*
	0.225806	0.178571	0.416667
	0.217391	0.0416667	0.194444
	0.115385	0.263158	0.324324
	0.35	0.344828	0.268293
	0.173913	0.277778	0.226415
	0.228571	0.230769	0.275862
	0.225806	0.687500*	0.190476
	0.178571	0.208333	0.366667
	0.263158	0.153846	0.218182
	0.163265	0.466667	0.2
	0.196078	0.555556	0.321429
	0.166667	0.269231	0.205128
	0.205882	0.428571	0.285714
	0.304348	0.103448	0.307692
	0.3	0.175	0.295455
	0.24	0.314286	0.333333
	0.21875	0.196078	0.134615
	0.222222	0.121212	0.125
	0.12	0.263158	0.0714286
	0.217391	0.212121	0.125
	0.185185	0.25	0.228571
	0.0714286	0.212121	0.0731707
	0.21875	0.0961538	0.157895
	0.151515	0.325	0.166667
	0.219512	0.285714	0.0769231
	0.111111	0.176471	0.194444
	0.388889	0.464286	0.229167
	0.255814	0.304348	0.0666667
	0.0555556	0.185185	0.108108
	0.264706	0.461539	0.111111
	0.1875	0.347826	0.222222
	0.384615	0.295455	0.227273
	0.5454546*	0.548387	0.108696
	0.363636	0.130435	0.171429
	0.0666667	0.619048	0.0967742
	0.222222	0.6	0.232558
	0.0909091	0.321429	0.272727
	0.333333	0.368421	0.125
	0.166667	0.166667	0.0476191
	0.380952	0.2	0.3333333*
	0.48	0.125	0.615385
	0.162162	0.1	0.25
	0.277778	0.304348	0.288889
	0.294118	0.103448	0.416667
	0.0625	0.111111	0.142857
	0.225	0.1	0.321429
	0.16	0.173913	0.307692
	0.181818		0.244444
* outliers			0.363636
average	0.223592	0.259766	0.241359
n	54	52	54
	p53MO vs. Control	Amotl2aMO vs. Control	Amotl2aMO vs. P53
Difference	0.16179	0.0794616	-0.0708633
P values	0.1205	0.3919	0.4639

## Sheet: K trailing region
	EdU ratio trailing region
	Control	p53MO	Amotl2aMo
	0.275362	0.232143	0.466667
	0.255319	0.209677	0.632653
	0.297297	0.363636	0.220588
	0.3125	0.269231	0.392857
	0.352941	0.316667	0.272727
	0.18	0.241935	0.4375
	0.195402	0.04918033*	0.3947369*
	0.28	0.320755	0.394495
	0.309278	0.170732	0.246575
	0.297872	0.181818	0.229885
	0.284314	0.176471	0.523077
	0.283582	0.114754	0.306667
	0.18254	0.25	0.435897
	0.235955	0.2352941*	0.359375
	0.368421	0.190476	0.542169
	0.2625	0.294872	0.432099
	0.171053	0.20339	0.258427
	0.197674	0.194805	0.333333
	0.308642	0.137931	0.368421
	0.287879	0.229885	0.4875
	0.279412	0.226667	0.488889
	0.267857	0.244444	0.342593
	0.25	0.52	0.236842
	0.211268	0.367347	0.302752
	0.308823	0.2	0.353448
	0.285714	0.128205	0.453704
	0.230089	0.380952	0.221311
	0.294118	0.355932	0.348214
	0.262295	0.320755	0.433962
	0.131579	0.223881	0.4
	0.347826	0.34	0.4
	0.12987	0.384615	0.423913
	0.294872	0.277778	0.407767
	0.318841	0.34375	0.378378
	0.283951	0.354167	0.302632
	0.28125	0.462687	0.408602
	0.266667	0.404762	0.325
	0.355932	0.422222	0.380435
	0.403226	0.27451	0.641791
	0.255814*	0.388889	0.25
	0.385714	0.108696	0.521739
	0.4	0.517857	0.521127
	0.630435	0.391304	0.5125
	0.162162	0.451613	0.289474
	0.6	0.382353	0.4625
	0.291667	0.421053	0.478723
	0.276316	0.295082	0.6734694*
	0.342857	0.27027	0.467742
	0.208955	0.276923	0.472727
	0.0895522	0.4	0.402299
	0.135135	0.387097	0.4
	0.213115	0.21875	0.342466
	0.185185	0.233333	0.457831
	0.166667	0.254545	0.525424
	0.217391		0.32
* outliers			0.373832
average	0.274949	0.2948	0.396102
n	54	52	54
	p53MO vs. Control	Amotl2aMO vs. Control	Amotl2aMO vs. P53
Difference	0.0721981	0.440637	0.34363
P values	0.3083	< 0.0001	< 0.0001
