# Supplementary material for: Amotl2a interacts with the Hippo effector Yap1 and the Wnt/β-catenin effector Lef1 to control tissue size in zebrafish
Source: eLife. 2015 Sep 3;4:e08201. doi: 10.7554/eLife.08201 (PMC4596637; doi:10.7554/eLife.08201)
Supplement: Figure 3—source data 4. — DOI: http://dx.doi.org/10.7554/eLife.08201.014 [file elife08201s006.xlsx]

## Sheet: Sheet1
Cell count	amotl2am RNA
	Experiment n°1		Experiment n°2		Experiment n°3		Experiment n°4		Experiment n°5		Total 5 experiments
	Uninjected control	amotl2am RNA	Uninjected control	amotl2am RNA	Uninjected control	amotl2am RNA	Uninjected control	amotl2am RNA	Uninjected control	amotl2am RNA	Uninjected control	amotl2am RNA
	138	118	152	123	118	79	121	90	106	43
	130	103	140	101	95	79	123	91	92	94
	146	112	146	108	83	93	115	80	106	97
	124	100	124	108	97	104	89	89	126	30
	132	84	159	112	83	93	66	124	90	78
	134	110	144	113	96		94	87	92	75
	110	119	142	133	97		111	108	101	72
	146	106	145	125	93		105	83	89	60
	140	136	158	138			109	87	92	77
	112	80	150	134			79	129	93	99
	121	101	150	134				113
		74		138				86
								83
Average	130.273	103.583	146.364	122.25	95.25	89.6	101.2	97.25	98.7	72.5	114.357	97.0367
n	11	12	11	12	8	5	10	13	10	10	50	52
	amotl2am RNA-inj. vs controls
Differences	-0.15146
P values	5.2036e-07
