# Supplementary material for: Amotl2a interacts with the Hippo effector Yap1 and the Wnt/β-catenin effector Lef1 to control tissue size in zebrafish
Source: eLife. 2015 Sep 3;4:e08201. doi: 10.7554/eLife.08201 (PMC4596637; doi:10.7554/eLife.08201)
Supplement: Figure 4—source data 1. — DOI: http://dx.doi.org/10.7554/eLife.08201.018 [file elife08201s007.xlsx]

## Sheet: I
CELL COUNTS	Zamotl2a mutants 30 hpf
	Experiment n°1		Experiment n°2		Experiment n°3		Total 3 experiments
Genotype	siblings	Zamotl2a-/-	siblings	Zamotl2a-/-	siblings	Zamotl2a-/-	siblings	Zamotl2a-/-
	143	223	154	179	106	121
	165	190	149	147	77*	148
	165	240	156	169	123	117
	143	169	121	198	88	129
	153	171	158	185	130	166
	163	193	169	142	97	112
	173*	178	145	162	102	128
	165	186	168	154	97	159
	163		150		87	113
	108		141		145	139
					89
					117
					88
					84
					108
					88
					115
* outliers					105
average	152	193.75	151.1	167	104.059	133.2	135.72	164.65
n	9	8	10	8	17	10	36	26
	Zamotl2a-/- vs siblings
Difference	0.213163
P values	1.9112e-06

## Sheet: L
CELL COUNTS	MZ amotl2a mutants 30 hpf
	Experiment n°1		Experiment n°2		Experiment n°3		Experiment n°4		Total 4 experiments
Genotype	controls	MZamotl2a-/-	controls	MZamotl2a-/-	controls	MZamotl2a-/-	controls	MZamotl2a-/-	controls	amotl2a-/-
	113	207	159	227	134	203	108	181
	130	166	136	183	165	234	118	186
	145	177	148	193	168	215	88	185
	121	180	173	242	180	206	116	168
	105	190	158	179	160	216	87	188
	109	195	170	226	152	212	109	173
	133	176	166	220	210	227	119	209
	174	181	147	232	205	231	143	154
	104	177	126	247	173	220	127	145
	133	171	134	211		193	119
	126	149
	163	194
	145	224
	156	179
	147	210
	128	233
	82	212
	141	177
	114	150
* outliers		162
average	129.947	185.5	151.7	216	171.889	215.7	113.4	176.556	141.734	198.439
n	19	20	10	10	9	10	10	9	48	49
	Zamotl2a-/- vs siblings
Difference	0.400079
P values	1.18e-21
