# Supplementary material for: Amotl2a interacts with the Hippo effector Yap1 and the Wnt/β-catenin effector Lef1 to control tissue size in zebrafish
Source: eLife. 2015 Sep 3;4:e08201. doi: 10.7554/eLife.08201 (PMC4596637; doi:10.7554/eLife.08201)
Supplement: Figure 4—source data 2. — DOI: http://dx.doi.org/10.7554/eLife.08201.019 [file elife08201s008.xlsx]

## Sheet: Sheet1
	Experiment n°1		Experiment n°2		Total 2 experiments
	controls	MZamotl2a-/-	controls	MZamotl2a-/-
	6	6	6	7
	6	8	6	8
	7	8	6	6
	6	5	6	8
	5	6	6	7
	6	7	6	8
	6	7	6	8
	5	8	6	8
	5	6	5	7
		7		6
				7
				6
average	5.77778	6.8	5.88889	7.16667	5.83333	6.98333
n	9	10	9	12	18	22
	MZamotl2a-/- vs controls
Difference	0.197143
P value	<0.0001
