# Supplementary material for: Amotl2a interacts with the Hippo effector Yap1 and the Wnt/β-catenin effector Lef1 to control tissue size in zebrafish
Source: eLife. 2015 Sep 3;4:e08201. doi: 10.7554/eLife.08201 (PMC4596637; doi:10.7554/eLife.08201)
Supplement: Figure 4—source data 3. — DOI: http://dx.doi.org/10.7554/eLife.08201.020 [file elife08201s009.xlsx]

## Sheet: Migration speed
	Migration speed um/h
	Control	MZamotl2a-/-
	56.7895	44.0056
	58.0995	37.946
	48.9239	43.68
	51.3158	27.8249
	53.3835	27.8177
	56.5032	42.6947
	57.4577	41.5843
	49.2415	41.2985
	47.424	37.5872
	47.4332	31.2743
	50.0177	29.6276
	60.5054	26.1797
average	53.0912	35.96
n	12	12
	MZamotl2a-/- vs. control
Difference	-0.322675
p value	< 0.0001
