# Supplementary material for: Amotl2a interacts with the Hippo effector Yap1 and the Wnt/β-catenin effector Lef1 to control tissue size in zebrafish
Source: eLife. 2015 Sep 3;4:e08201. doi: 10.7554/eLife.08201 (PMC4596637; doi:10.7554/eLife.08201)
Supplement: Figure 4—source data 4. — DOI: http://dx.doi.org/10.7554/eLife.08201.021 [file elife08201s010.xlsx]

## Sheet: A
	Cell counts in neuromasts and interneuromastic chain																														p53Mo Control
n1	44	39	45	42	49	47	47	44	43	47	34	35	27	33	35	38	35	31	42	39	37	44	56	40	51	36	46	32			34	29	30	28	33	40	36	31	38	38	30	34	33	27	27	28	32	22	33
i2	19	23	24	22	27	20	26	27	32	35	14	7	23	20	23	21	17	21	22	24	22	27	19	17	27	30	33	32			33	27	22	36	25	27	28	20	24	18	22	25	27	42	13	27	24	25	27
n2	47	47	43	49	45	50	43	48	29	42	32	29	36	41	34	37	32	37	38	39	44	43	57	48	53	40	52	39			36	34	36	36	34	33	35	27	35	36	34	38	36	44	35	40	29	29	34
i3	9	22	13	18	30	20	15	8	2	14	9	17	6	13	12	13	13	14	6	14	20	20	18	16	13	9	9	21			19	17	18	10	12	10		4	9	9	15	17	10	19	19	12	6	7	10
n3	38	46	43	42	43	38	45	40	29	43	39	45	37	47	29	40	37		30	42	54	45	39	48	53	60	43	48			34	34	28	39	35	36		33	37	37	33	41	38	36	30	33	33	27	34
		p values
Control vs. p53Mo	n1	0.0124388
	i1	0.111334
	n2	0.760208
	i2	0.71669
	n3	0.0466278
Control vs.Amotl2aMo	n1	0.857204
	i1	0.919759
	n2	0.388606
	i2	0.405919
	n3	0.231015
p53Mo vs. Amotl2aMo	n1	0.0554704
	i1	0.187094
	n2	0.528583
	i2	0.644638
	n3	0.548814
[truncated: 38 more columns]

## Sheet: B
	Cell counts in neuromasts
	Experiment n°1		Experiment n°2		Total 2 experiments
	controls	MZamotl2a-/-	controls	MZamotl2a-/-	controls	MZamotl2a-/-
	30	34	38	41
	28	38	37	34
	36	34	43	34
	36	38	37	39
	34	38	28	33
	38	32	37	40
	37	34	32	29
	35	36	39
	38		30
			33
average	34.6667	35.5	35.4	35.7143	35.0333	35.6071
n	9	8	10	7	19	15
P value						0.6652
