# Supplementary material for: Amotl2a interacts with the Hippo effector Yap1 and the Wnt/β-catenin effector Lef1 to control tissue size in zebrafish
Source: eLife. 2015 Sep 3;4:e08201. doi: 10.7554/eLife.08201 (PMC4596637; doi:10.7554/eLife.08201)
Supplement: Figure 5—source data 1. — DOI: http://dx.doi.org/10.7554/eLife.08201.025 [file elife08201s011.xlsx]

## Sheet: Yap1Mo
Cell count	Yap1Mo
	Experiment n°1		Experiment n°2		Experiment n°3		Total 3 experiments
	Uninjected control	Yap1Mo	Uninjected control	Yap1Mo	Uninjected control	Yap1Mo	Uninjected control	Yap1Mo
	121	108	112	88	131	101
	128	91	119	79	88	106
	119	98	155	92	111	107
	114	115	112	87	125	101
	113	86	116	91	97	130
	130	122	126	85	82	72
	118	108	137	87	96	122
	112	120	112	97	114	105
	121	127	128	79	118	112
	131	126	137	97		128
	127	119	128	85		109
	117	103	130	94
	127	95	154	93
	99	70	122	101
	118	109		82
	124	84		97
		100		63
		91		94
		104		99
		115		87
		88		82
		95		104
		109		93
		108		82
		102		72
		106		68
		93		105
		131		73
		119		78
		91		96
		104		83
				103
				60
				91
				105
				78
				106
				97
				102
							Uninjected control	Yap1Mo
Average	119.938	104.419	127.714	88.5897	106.889	108.455	118.18	100.488
n	16	31	14	39	9	11	39	81
	yap1Mo vs. Controls
Difference	-0.149706
P values	2.6534e-12
