# Supplementary material for: Amotl2a interacts with the Hippo effector Yap1 and the Wnt/β-catenin effector Lef1 to control tissue size in zebrafish
Source: eLife. 2015 Sep 3;4:e08201. doi: 10.7554/eLife.08201 (PMC4596637; doi:10.7554/eLife.08201)
Supplement: Figure 5—source data 2. — DOI: http://dx.doi.org/10.7554/eLife.08201.026 [file elife08201s012.xlsx]

## Sheet: N
CELL COUNTS	Yap1 mutants 24 hpf
	Experiment n°1		Experiment n°2		Experiment n°3		Experiment n°4		Total 4 experiments
Genotype	Yap1+/+	MZYap1-/-	Yap1+/+	MZYap1-/-	Yap1+/+	MZYap1-/-	Yap1+/+	MZYap1-/-	Yap1+/+	MZYap1-/-
	95	75	126	106	115	75	126	79
	120	120	112	119	101	101	106	89
	120	112	108	104	105	89	143	97
	130	132	105	118	105	91	127	104
	135	116	104	89	114	113	114	84
	145	116	114	96	124	120	99	99
	150	92	127	58	112	111	104	93
	133	116	129	93	131	107	118	124
	122	96	96	101	121	115	106	82
	132	103	125	102	107	89	118	93
	114	87	125	128	97	106	143	89
	114	96	107	90		87	169	106
			129			109	97
			113
average	125.833	105.083	115.714	100.333	112	101	120.769	94.9167	118.579	100.333
n	12	12	14	12	11	13	13	12	50	49
	MZYap1-/- vs controls
Difference	-0.153871
P values	4.12e-08

## Sheet: O
CELL COUNTS	Yap1 mutants 30 hpf
	Experiment n°1		Experiment n°2		Experiment n°3		Experiment n°4		Experiment n°5		Total 5 experiments
Genotype	Yap1+/+	MZYap1-/-	Yap1+/+	MZYap1-/-	Yap1+/+	MZYap1-/-	Yap1+/+	MZYap1-/-	Yap1+/+	MZYap1-/-	Yap1+/+	Yap1-/-
	88	66	119	84	83	57	106	111	115	69
	72	109	73	68	75	87	"141"	109	83	61
	83	61	101	62	79	69	113	102	"140"	49
	112	81	85	65	89	75	104	112	95	57
	103	95	124	82	72	"20"	108	117	103	66
	99	83	87	67	85	67	99	81	97	66
	87	69	103	79	86	54	115	53	96	58
	97	94	96	73	95	61	130	72	97	83
	98	94	88	89	94	50	107	73	99	78
	80	76			73	39	96	77	113	73
	89	65				71
	99	78				70
	94	88
	88	97
	79	93
	109	81
	92	89
	74	76
average	91.2778	83.0556	97.3333	74.3333	83.1	63.6364	108.667	90.7	99.7778	66	96.0311	75.5451
n	18	18	9	9	10	11	9	10	9	10	55	58
	MZYap1-/- vs controls
Difference	-0.213327
P values	2.15e-10

## Sheet: P
CELL COUNTS	Yap1 mutants 36 hpf
	20150511		20150526		20150616		Total 3 experiments
Genotype	Yap1+/+	MZYap1-/-	Yap1+/+	MZYap1-/-	Yap1+/+	MZYap1-/-	Yap1+/+	Yap1-/-
	98	67	75	56	90	70
	80	64	81	66	82	70
	98	80	85	68	87	60
	83	77	75	93	99	76
	73	55	85	62	91	46
	101	72	87	73	75	90
	92	86	87	84	87	58
	150*	60	113	66	103	58
	111	63	87	63	66	53
	89	67	80	72	99	56
	150*	73	97	80	95	50
	128	57	90	61	81	63
	98	41*		80
	112	63		55
		61		59
outliers*
average	96.9167	67.5	86.8333	69.2	87.9167	62.5	90.5556	66.4
n	12	14	12	15	12	12	36	41
	MZYap1-/- vs controls
Difference	-0.266748
P values	2.41e-14
