# Supplementary material for: Amotl2a interacts with the Hippo effector Yap1 and the Wnt/β-catenin effector Lef1 to control tissue size in zebrafish
Source: eLife. 2015 Sep 3;4:e08201. doi: 10.7554/eLife.08201 (PMC4596637; doi:10.7554/eLife.08201)
Supplement: Figure 5—source data 3. — DOI: http://dx.doi.org/10.7554/eLife.08201.027 [file elife08201s013.xlsx]

## Sheet: Zyap1 mutant30hpf
CELL COUNTS	Zyap1 mutants 30 hpf
	Experiment n°1		Experiment n°2		Experiment n°3		Experiment n°4		Total 4 experiments
Genotype	yap1 +/+	Zyap1-/-	yap1 +/+	Zyap1-/-	yap1 +/+	Zyap1-/-	yap1 +/+	Zyap1-/-	yap1 +/+	Zyap1-/-
	89	82	118	96	65	60	87	93
	111	74	85	61	98	70	136	77
		88	118	81	71	70	73	88
			112	92	94	73	97	80
			89	73	76	77	102	90
			103		74	64	91
			108		85	61	120
			102
			119
			104
average	100	81.3333	105.8	80.6	80.4286	67.8571	100.857	85.6	96.7714	78.8476
n	2	3	10	5	7	7	7	5	26	20
	Zyap1-/- vs Yap1 +/+
Difference	-0.185218
P values	1.25e-05
