# Supplementary material for: Amotl2a interacts with the Hippo effector Yap1 and the Wnt/β-catenin effector Lef1 to control tissue size in zebrafish
Source: eLife. 2015 Sep 3;4:e08201. doi: 10.7554/eLife.08201 (PMC4596637; doi:10.7554/eLife.08201)
Supplement: Figure 5—source data 4. — DOI: http://dx.doi.org/10.7554/eLife.08201.028 [file elife08201s014.xlsx]

## Sheet: D
	Number of neuromasts in MZyap1 mutants
	Experiment n°1		Experiment n°2		Total 2 experiments
	controls	MZyap1-/-	controls	MZyap1-/-
	5	6	5	5
	5	5	6	5
	4	6	5	5
	5	6	5	6
	6	6	5	5
	5	6	6	6
	6	5	7	5
	5	5	5	5
	6		6	6
	5		6
average	5.2	5.625	5.6	5.33333	5.4	5.47917
n	10	8	10	9	20	17
P value						0.722

## Sheet: E
	Total cell number per neuromast in MZyap1 mutants
	controls	MZyap1-/-
	49	37
	43	41
	37	38
	34	44
	40	35
	37	35
	38	48
	35	37
	39	35
	39	39
average	39.1	38.9
n	10	10
P value		0.9184

## Sheet: H
	Hair cell number per neuromast in MZyap1 mutants
	controls	MZyap1-/-
	9	9
	9	8
	6	9
	8	10
	8	10
	8	10
	8	8
	10	10
	9	8
	9	10
average	8.4	9.2
n	10	10
P value		0.0909
