# Supplementary material for: Amotl2a interacts with the Hippo effector Yap1 and the Wnt/β-catenin effector Lef1 to control tissue size in zebrafish
Source: eLife. 2015 Sep 3;4:e08201. doi: 10.7554/eLife.08201 (PMC4596637; doi:10.7554/eLife.08201)
Supplement: Figure 6—source data 1. — DOI: http://dx.doi.org/10.7554/eLife.08201.031 [file elife08201s015.xlsx]

## Sheet: Sheet1
	Cell counts in Amotl2a;Yap1 Double morphants 30 hpf
	experiments n°1					experiments n°2					experiments n°3					experiments n°4					experiments n°5					Total 5 experiments
	uninjected controls	p53 Mo controls	Amotl2aMo	Amotl2aMo + Yap1Mo	Yap1Mo	uninjected controls	p53 Mo controls	Amotl2aMo	Amotl2aMo + Yap1Mo	Yap1Mo	uninjected controls	p53 Mo controls	Amotl2aMo	Amotl2aMo + Yap1Mo	Yap1Mo	uninjected controls	p53 Mo controls	Amotl2aMo	Amotl2aMo + Yap1Mo	Yap1Mo	uninjected controls	p53 Mo controls	Amotl2aMo	Amotl2aMo + Yap1Mo	Yap1Mo	uninjected controls	p53 Mo controls	Amotl2aMo	Amotl2aMo + Yap1Mo	Yap1Mo
	128	145	104	136	99	114	141	173	76	61	132	116	215	141	122	153	125	212	132	135	141	113	139	124	62
	155	135	203	157	92	118	128	178	121	72	101	161	169	163	119	118	135	216	133	126	113	94	153	116	64
	116	148	123	117	155	104	122	171	100	49	135	115	276	161	141	155	124	189	171	138	75	71	120	123	63
	129	134	149	138	98	114	151	202	114	77	137	137	167	145	115	149	134	195	155	134	135	67	176	118	66
	123	147	191	118	73	100	140	155	163	60	144	127	236	131	99	119	140	179	109	145	103		176	132
	125	134	157	135	91	97	112	170	96	69	124	150	173	171	111	140	130	210	119	117	139		157	131
	126	111		169	144	91	120	203	135	72	143	184	176	139	153	128	201	172	133	132	105		149	111
						124	110	180	83	68	121	188	199	150	131	127	132	186	138	144	142		199	105
						109	119	196	80	70	109	181	170	144	114	174	120	205	128	126	93		125	128
						88	148	182	78	64		159	217	147	113	129	128	206	147	123	120		165	135
						107	127	158	116	73						146	119	202	155	133	106		128	111
						110	143	151	98	65						105	137	165	121	139	131		149	109
						121	138		150	80						131	152	174	149	170	119		154	115
						104	124		108	76						153	120	200	110	107	137		155	156
							119		111							116				149			145	107
n	7	7	6	7	7	14	15	12	15	14	9	10	10	10	10	15	14	14	14	15	14	4	15	15	4	59	50	57	61	50
average	128.857	136.286	154.5	138.571	107.429	107.214	129.467	176.583	108.6	68.2857	127.333	151.8	199.8	149.2	121.8	136.2	135.5	193.643	135.714	134.533	118.5	86.25	152.667	121.4	63.75	123.621	127.86	175.439	130.697	99.1595
	Amotl2Mo vs ctrl	Yap1 Mo vs ctrl	Db Mo vs ctrl	Amotl2aMo vs Db Mo	Yap1Mo vs Db Mo
Differences	0.419165	-0.197874	0.057241	0.342329	-0.241303
P values	1.6438e-19	1.6898e-06	0.097557	1.531e-16	2.9292e-08
