# Supplementary material for: Amotl2a interacts with the Hippo effector Yap1 and the Wnt/β-catenin effector Lef1 to control tissue size in zebrafish
Source: eLife. 2015 Sep 3;4:e08201. doi: 10.7554/eLife.08201 (PMC4596637; doi:10.7554/eLife.08201)
Supplement: Figure 6—source data 2. — DOI: http://dx.doi.org/10.7554/eLife.08201.032 [file elife08201s016.xlsx]

## Sheet: EdU ratio leading region
	EdU ratio leading region
	Control	p53MO	Amotl2aMo	Amotl2a+Yap1MO	Yap1MO
	0.21875	0.175	0.134615	0.153846	0.230769
	0.222222	0.314286	0.125	0.380952	0.225806
	0.12	0.196078	0.0714286	0.395833	0.314286
	0.217391	0.121212	0.125	0.217391	0.545455
	0.185185	0.263158	0.228571	0.363636	0.115385
	0.0714286	0.212121	0.0731707	0.268293	0.476191
	0.21875	0.25	0.157895	0.214286	0.294118
	0.151515	0.212121	0.166667	0.400000*	0.272727
	0.219512	0.0961538	0.0769231	0.1	0.12
	0.111111	0.325	0.194444	0.131579	0.333333
	0.388889	0.285714	0.229167	0.25	0.518518
	0.255814	0.176471	0.0666667	0.272727	0.36
	0.0555556	0.464286	0.108108	0.500000*	0.466667
	0.264706	0.304348	0.111111	0.176471	0.272727
	0.1875	0.185185	0.222222	0.2	0.323529
	0.384615	0.461539	0.227273	0.3125	0.241379
	0.5454546*	0.347826	0.108696	0.166667	0.242424
	0.363636	0.295455	0.171429	0.321429	0.625
	0.0666667	0.548387	0.0967742	0.222222	0.423077
	0.222222	0.130435	0.232558	0.464286	0.212121
	0.0909091	0.619048	0.272727	0.172414	0.6666667*
	0.333333	0.6	0.125	0.227273	0.285714
	0.166667	0.321429	0.0476191	0.363636	0.176471
	0.380952	0.368421	0.3333333*	0.275862	0.342857
	0.48	0.166667	0.615385	0.243902	0.130435
	0.162162	0.2	0.25	0.222222	0.454545
	0.277778	0.125	0.288889	0.424242	0.116279
	0.294118	0.1	0.416667	0.272727	0.24
	0.0625	0.304348	0.142857	0.25	0.185185
	0.225	0.103448	0.321429	0.4	0.276596
	0.16	0.111111	0.307692	0.166667
	0.181818	0.1	0.244444	0.153846
		0.173913	0.363636	0.189189
				0.3125
* outliers
Average	0.217442	0.262368	0.197627	0.258956	0.304193
n	32	33	33	32	29
	p53MO vs. Control	Amotl2aMO vs. Control	Amotl2a+Yap1MO vs. Control	Yap1MO vs. Control	Amotl2aMO vs. p53MO	Amotl2a+Yap1MO vs. p53MO	Yap1MO vs. p53MO	Amotl2a+Yap1MO vs. Amotl2aMO	Amotl2aMO vs. Yap1MO	Amotl2a+Yap1MO vs. Yap1MO
Differences	0.206612	-0.0911285	0.19092	0.39896	-0.246758	-0.0130055	0.159411	-0.148711	-0.350323	-0.148711
P values	0.1633	0.4929	0.107	0.0082	0.0542	0.9102	0.2436	0.0258	0.0019	0.1363

## Sheet: EdU ratio trailing region
	EdU ratio trailing region
	Control	p53MO	Amotl2aMo	Amotl2a+Yap1MO	Yap1MO
	0.211268	0.244444	0.302752	0.348485	0.411765
	0.308823	0.52	0.353448	0.310811	0.298246
	0.285714	0.367347	0.453704	0.25	0.0869565
	0.230089	0.2	0.221311	0.328947	0.192983
	0.294118	0.128205	0.348214	0.627907	0.258621
	0.262295	0.380952	0.433962	0.0857143	0.216216
	0.131579	0.355932	0.4	0.3125	0.305556
	0.347826	0.320755	0.4	1.000000*	0.106383
	0.12987	0.223881	0.423913	0.263158	0.075
	0.294872	0.34	0.407767	0.421053	0.190476
	0.318841	0.384615	0.378378	0.295082	0.326087
	0.283951	0.277778	0.302632	0.454545	0.4
	0.28125	0.34375	0.408602	0.3111111*	0.309091
	0.266667	0.354167	0.325	0.363636	0.25641
	0.355932	0.462687	0.380435	0.424242	0.152174
	0.403226	0.404762	0.641791	0.290909	0.176471
	0.255814*	0.422222	0.25	0.333333	0.0238095
	0.385714	0.27451	0.521739	0.375	0.297297
	0.4	0.388889	0.521127	0.423077	0.35
	0.630435	0.108696	0.5125	0.224719	0.125
	0.162162	0.517857	0.289474	0.456522	0.4848485*
	0.6	0.391304	0.4625	0.440678	0.384615
	0.291667	0.451613	0.478723	0.186441	0.203125
	0.276316	0.382353	0.6734694*	0.40625	0.307692
	0.342857	0.421053	0.467742	0.0985916	0.208333
	0.208955	0.295082	0.472727	0.387755	0.257143
	0.0895522	0.27027	0.402299	0.195122	0.0833333
	0.135135	0.276923	0.4	0.246154	0.275862
	0.213115	0.4	0.342466	0.306667	0.318182
	0.185185	0.387097	0.457831	0.317647	0.212766
	0.166667	0.21875	0.525424	0.24
	0.217391	0.233333	0.32	0.2
		0.254545	0.373832	0.402778
				0.285714
* outliers
Average	0.281015	0.333448	0.405634	0.321982	0.234814
n	32	33	33	34	30
	p53MO vs. Control	Amotl2aMO vs. Control	Amotl2a+Yap1MO vs. Control	Yap1MO vs. Control	Amotl2aMO vs. p53MO	Amotl2a+Yap1MO vs. p53MO	Yap1MO vs. p53MO	Amotl2a+Yap1MO vs. Amotl2aMO	Amotl2aMO vs. Yap1MO	Amotl2a+Yap1MO vs. Yap1MO
Differences	0.186582	0.44346	0.145783	-0.16441	0.216485	-0.0343838	-0.295801	-0.206225	0.727474	0.371226
P values	0.0649	< 0.0001	0.1687	0.1165	0.0032	0.6643	0.0003	0.0016	< 0.0001	0.0024
