# Supplementary material for: Amotl2a interacts with the Hippo effector Yap1 and the Wnt/β-catenin effector Lef1 to control tissue size in zebrafish
Source: eLife. 2015 Sep 3;4:e08201. doi: 10.7554/eLife.08201 (PMC4596637; doi:10.7554/eLife.08201)
Supplement: Figure 6—source data 3. — DOI: http://dx.doi.org/10.7554/eLife.08201.033 [file elife08201s017.xlsx]

## Sheet: Sheet1
Cell count	Cell counts in embryos co-injected with Amotl2aMo and amotl2am or with Amotl2aMo and amotl2amLP
	Experiment n°1					Experiment n°2					Experiment n°3					Experiment n°4
	Uninjected controls	p53Mo controls	Amotl2aMo	Amotl2aMo+ amotl2am RNA	Amotl2aMo+ amotl2amLP RNA	Uninjected controls	p53Mo controls	Amotl2aMo	Amotl2aMo+ amotl2am RNA	Amotl2aMo+ amotl2amLP RNA	Uninjected controls	p53Mo controls	Amotl2aMo	Amotl2aMo+ amotl2am RNA	Amotl2aMo+ amotl2amLP RNA	Uninjected controls	p53Mo controls	Amotl2aMo	Amotl2aMo+ amotl2am RNA	Amotl2aMo+ amotl2amLP RNA
	123	146	205	143	134	118	131	169	98	187	121	96	167	100	173	121	114	185	160	225
	107	127	208	185	145	116	142	140	136	163	123	104	172	87	138	111	115	141	129	154
	113	139	152	141	129	119	142	109	123	178	115	107	140	179	173	75	90	191	127	159
	109	159	180	121	131	129	147	145	138	197	89	121	134	125	181	108	88	159	102	85
	84	125	198	143	175	155	141	135	102	165	66	107	206	104	155	104	104	134	125	148
	104	135	177	183	119	127	133	159	127	140	94	94	173	96	169	105	104	147	143	171
	126	99	230	165	148	70	161	141	140	166	111	92	144	139	151	114	119	159	145	146
	113	126	199	118	177	107	133	161	125	189	105	107	189	116	135	107		128	142
	107	155	142	113	129	139	140	141	92	173	109	113	170	139	159				140
	93	134	163	144	155	135	136		103	148	79	116	148		182
	110	107	150	102	158	139			110	156			165		140
	114		163		168	148			158	187			141		161
			168						130				183		152
													186
																						Uninjected controls	p53Mo controls	Amotl2aMo	Amotl2aMo+ amotl2am RNA	Amotl2aMo+ amotl2amLP RNA
Average	108.583	132	179.615	141.636	147.333	125.167	140.6	144.444	121.692	170.75	101.2	105.7	165.571	120.556	159.154	105.625	104.857	155.5	134.778	155.429		440.575	483.157	645.131	518.662	632.666
n	12	11	13	11	12	12	10	9	13	12	10	10	14	9	13	8	7	8	9	7		42	38	44	42	44
	p53Mo controls vs. Uninjected controls	Amotl2aMo vs. Uninjected controls	Amotl2aMo+ amotl2am RNA vs. Uninjected controls	Amotl2aMo + amotl2amLP RNA vs. Uninjected controls	Amotl2aMo vs. p53Mo controls	Amotl2aMo+ amotl2am RNA vs. p53Mo controls	Amotl2aMo + amotl2amLP RNA vs. p53Mo controls	Amotl2aMo+ amotl2am RNA vs. Amotl2aMo	Amotl2aMo + amotl2amLP RNA vs. Amotl2aMo	Amotl2aMo + amotl2amLP RNA vs. Amotl2aMo + amotl2am RNA
Difference	0.096	0.464	0.177	0.436	0.335	0.073	0.31	-0.196036	-0.0193224	0.219804
P value	0.49815	7.2233e-16	0.00030087	2.1797e-16	3.7204e-14	0.0021614	1.0339e-13	6.3611e-08	0.18505	1.6232e-06
