# Supplementary material for: Amotl2a interacts with the Hippo effector Yap1 and the Wnt/β-catenin effector Lef1 to control tissue size in zebrafish
Source: eLife. 2015 Sep 3;4:e08201. doi: 10.7554/eLife.08201 (PMC4596637; doi:10.7554/eLife.08201)
Supplement: Figure 6—source data 4. — DOI: http://dx.doi.org/10.7554/eLife.08201.034 [file elife08201s018.xlsx]

## Sheet: Sheet1
	Cell counts in MZamotl2a;MZyap1 double mutants
	experiments n°1				experiments n°2				experiments n°3			experiments n°4			experiments n°5				Total 5 experiments
	Amotl2a+/+;Yap1+/+	Amotl2a-/-;Yap1+/+	Amotl2a+/+;Yap1-/-.	Amotl2a-/-;Yap1-/-	Amotl2a+/+;Yap1+/+	Amotl2a-/-;Yap1+/+	Amotl2a+/+;Yap1-/-.	Amotl2a-/-;Yap1-/-	Amotl2a+/+;Yap1+/+	Amotl2a+/+;Yap1-/-.	Amotl2a-/-;Yap1-/-	Amotl2a+/+;Yap1+/+	Amotl2a-/-;Yap1+/+	Amotl2a-/-;Yap1-/-	Amotl2a+/+;Yap1+/+	Amotl2a-/-;Yap1+/+	Amotl2a+/+;Yap1-/-.	Amotl2a-/-;Yap1-/-	Amotl2a+/+;Yap1+/+	Amotl2a-/-;Yap1+/+	Amotl2a+/+;Yap1-/-.	Amotl2a-/-;Yap1-/-
	101	142	79	114	106	129	66	140	135	81	129	128	131	129	130	201	74	115
	98	153	94	109	152	148	84	102	101	74	113	121	118	148	116	163	100	94
	65	131	86	85	115	139	71	140	111	61	139	97	135	131	137	206	95	88
	96	193	97	112	143	181	74	124	112	77	116	124	106	87	126	161	70	86
	67	159	94	88	167	174	61	129	110	88	98	124	143	100	140	167	69	108
	107	184	110	69	194	185	77	119	83	76	126		157	66	105	151	85	100
	79	160	86	128	90	131	69	134	150	96	110		154	97	109	142	59	91
	85	163	85	87	112	165	73	134	102	82	110		141	107	99	168	90	111
	87	152	87	97	117	160	81	110	122	71	108		142	130	130	167	86	87
	97	178		113	128	185	92	129	112	75	95		157	110	136	146	80	75
	101	157		129	114	174	100	127		78	96			104	122		65	116
	120	219		120	151	150	57	109		53	106			114	91		55	89
	85	170		100	158	163	66	124			100			131				126
		138		116	161	172	87	121			116			120				93
		207			97	131	74				118			126				55
											76			96				99
														94				85
														116				95
														92				114
														117
														103
n	13	15	9	14	15	15	15	14	10	12	16	5	10	21	12	10	12	19	55	50	48	84
average	91.3846	167.067	90.8889	104.786	133.667	159.133	75.4667	124.429	113.8	76	109.75	118.8	138.4	110.381	120.083	167.2	77.3333	96.1579	115.547	157.95	79.9222	109.101
	Amotl2 Mt vs ctrl	Yap1 Mt vs ctrl	Db Mt vs ctrl	Amotl2a-/- vs Db Mt	yap1-/- vs Db Mt
Difference	0.366977	-0.308314	-0.0557894	0.447746	-0.267445
P values	4.6164e-11	2.8798e-14	0.060639	3.9152e-13	1.0914e-11
