# Supplementary material for: Amotl2a interacts with the Hippo effector Yap1 and the Wnt/β-catenin effector Lef1 to control tissue size in zebrafish
Source: eLife. 2015 Sep 3;4:e08201. doi: 10.7554/eLife.08201 (PMC4596637; doi:10.7554/eLife.08201)
Supplement: Figure 7—source data 1. — DOI: http://dx.doi.org/10.7554/eLife.08201.037 [file elife08201s019.xlsx]

## Sheet: relative lef1 exp area
	Relative area of the lef1 expression domain
	Controls	MZamotl2a-/-
	0.362755	0.571254
	0.329062	0.774387
	0.427167	0.448553
	0.473729	0.419921
	0.349461	0.585533
	0.441705	0.342019
	0.312388	0.658126
	0.388188	0.342744
	0.350534	0.531328
	0.430327	0.534928
	0.383596	0.372929
	0.626969	0.325423
	0.301091	0.479291
	0.309547	0.598481
	0.378366	0.435852
	0.199767	0.490611
	0.321849	0.455503
	0.539203	0.394064
	0.229668	0.272016
	0.283911	0.230141
	0.309307	0.512492
average	0.36898	0.465505
n	21	21
	MZamotl2a-/- vscontrols
difference	0.261597
P value	0.0047
