# Supplementary material for: Amotl2a interacts with the Hippo effector Yap1 and the Wnt/β-catenin effector Lef1 to control tissue size in zebrafish
Source: eLife. 2015 Sep 3;4:e08201. doi: 10.7554/eLife.08201 (PMC4596637; doi:10.7554/eLife.08201)
Supplement: Figure 7—source data 2. — DOI: http://dx.doi.org/10.7554/eLife.08201.038 [file elife08201s020.xlsx]

## Sheet: Sheet1
CELL COUNTS	Amotl2a_Yap1dMU_Lef1MO 30hpf
	Experiment n°1				Experiment n°2								experiment n°3									Total 3 experiments
Genotype	Control	Control + Lef1Mo	MZamotl2a-/-	MZamotl2a-/- + Lef1Mo	Control	Control + Lef1Mo	MZamotl2a-/-	MZamotl2a-/- + Lef1Mo	MZamotl2a;MZyap1 mutants	MZamotl2a;MZyap1 mutants + Lef1Mo	MZyap1-/-	MZyap1-/- + Lef1Mo	Control	Control + Lef1Mo	MZamotl2a-/-	MZamotl2a-/- + Lef1Mo	MZamotl2a;MZyap1 mutants	MZamotl2a;MZyap1 mutants + Lef1Mo	MZyap1-/-	MZyap1-/- + Lef1Mo
	111	141	139	94	101	130	142	137	125	*134	106	90	87	127	189	93	105	86	70	66
	103	139	151	122	135	124	132	*156	*151	79	99	90	125	89	167	103	125	85	79	93
	112	126	*222	118	94	101	150	122	103	*113	59	95	105	93	145	*166	119	65	71	61
	157	105	176	124	118	136	112	132	109	77	100	73	77	71	150	118	115	93	78	58
	74	108	179	121	111	157	159	125	126		76	81	116	96	124	110	113	95	65	65
	88	109	148	128	110	134	194	102	110		87	50	142	91	141	118	121	100	77	87
	86	111	132	116	150	163	143	99	*59		65	59	143	88	190	117	119	83	67	68
	116	110	116	113	112	62	114	114			71	73	115	38		128	128	92	87	50
	134	95	134	90	104	100	137	107			79	99	110	87		127		71	98	66
	90	88	143	121	105	69	151	113			79	*134	92	85		97		95	78	67
	105	109	147	115	93	*42	138	89			99	89	102	93		76			61	88
	107	121	148	*161	80	77	138	123			83	114	138	84		87			85	69
	141	102	161	128		70					105	111							75	69
	148		*212	119		98					81	76							51	86
			108									80
																						Control	Control + Lef1Mo	MZamotl2a-/-	MZamotl2a-/- + Lef1Mo	MZamotl2a;MZyap1 mutants	MZamotl2a;MZyap1 mutants + Lef1Mo	MZyap1-/-	MZyap1-/- + Lef1Mo
Average	112.286	112.615	144.769	116.077	109.417	109.308	142.5	114.818	114.6	78	84.9286	84.2857	112.667	86.8333	158	106.727	118.125	86.5	74.4286	70.9286		111.456	102.919	148.423	112.541	116.362	82.25	79.6786	77.6071
n	14	13	15	14	12	14	12	12	7	4	14	15	12	12	7	12	8	10	14	14		38	39	34	38	15	14	28	29
	Lef1Mo vs. control	MZamotl2a-/- vs. Control	MZamotl2a-/- + Lef1Mo vs. Control	MZamotl2a;MZyap1 vs. Control	MZamotl2a;MZyap1 mutants + Lef1Mo vs. Control	MZyap1-/- vs. Control	MZyap1-/- + Lef1Mo vs. Control	MZamotl2a-/- + Lef1Mo vs lef1 Mo	MZamotl2a-/- + Lef1Mo vs MZ amotl2a-/-	MZamotl2a;MZyap1 mutants + Lef1Mo vs MZ amotl2a-/-;yap1-/-	MZamotl2a;MZyap1 mutants + Lef1Mo vs MZyap1-/-
Differences	-0.0765999	0.33167	0.00972976	0.0440186	-0.200826	-0.285114	-0.303699	0.0934911	-0.241757	-0.293157	0.0322725
P values	0.099101	2.891e-09	0.28081	0.51504	0.0015527	1.5989e-09	6.0822e-08	0.010035	5.3174e-08	0.0013515	0.01854
