# Supplementary material for: Amotl2a interacts with the Hippo effector Yap1 and the Wnt/β-catenin effector Lef1 to control tissue size in zebrafish
Source: eLife. 2015 Sep 3;4:e08201. doi: 10.7554/eLife.08201 (PMC4596637; doi:10.7554/eLife.08201)
Supplement: Figure 7—source data 3. — DOI: http://dx.doi.org/10.7554/eLife.08201.039 [file elife08201s021.xlsx]

## Sheet: Sheet1
	Relative lef1 expression domain
	Uninjected controls	p53Mo controls	Amotl2aMo
	0.199373	0.0819716	0.402178
	0.284843	0.223973	0.37857
	0.196272	0.237322	0.267156
	0.382177	0.334125	0.248466
	0.193558	0.23584	0.298864
	0.189667	0.194481	0.432807
	0.306392	0.221939	0.339297
	0.260808	0.238379	0.282742
	0.185133	0.264284	0.379113
	0.238365	0.223896	0.259539
	0.235811	0.16922	0.372139
	0.218506	0.1542	0.267392
	0.275479	0.203926	0.267922
	0.134346	0.396221	0.274154
	0.178066	0.230601	0.371461
	0.157971	0.24935	0.32543
	0.193097	0.227095	0.257553
	0.352899	0.0951973	0.41169
	0.234884	0.145572	0.82*
	0.30814	0.126822	0.389703
	0.475706	0.303598	0.62*
	0.310484	0.151924	0.64*
	0.21436	0.426463	0.597121
		0.317969	0.693378
		0.42491
		0.34425
		0.535677
Average	0.248971	0.250341	0.327693
n	23	27	22
	p53Mo controls vs. uninjected controls	Amotl2aMo vs. uninjected controls	Amotl2aMo vs. p53Mo controls
Difference	0.008	0.3334	0.28
P value	0.9591	0.0008	0.0023
